# Supplementary material for: Microscopy Visualization of Carrier Transport in CdSeTe/CdTe Solar Cells
Source: PubMed Central journal article supplement (PMC9460435; doi:10.1021/acsami.2c09426), 2022-08-24
Supplement: am2c09426_si_001.pdf [file am2c09426_si_001.pdf]

1 **Supporting Materials**

2  
3  
4  
5 **Microscopy Visualization of Carrier Transport in CdSeTe/CdTe**  
6 **Solar Cells**

7  
8  
9 Chuanxiao Xiao,<sup>1\*</sup> Chun-Sheng Jiang,<sup>1</sup> Marco Nardone,<sup>2</sup> David Albin,<sup>1</sup> Adam Danielson,<sup>3</sup> Amit  
10 H. Munshi,<sup>3</sup> Tushar Shimpi,<sup>3</sup> Walajabad Sampath,<sup>3</sup> Sean Jones,<sup>1</sup> Mowafak M. Al-Jassim,<sup>1</sup> Glenn  
11 Teeter,<sup>1</sup> Nancy M. Haegel,<sup>1</sup> and Helio R. Moutinho<sup>1</sup>

12  
13 <sup>1</sup>National Renewable Energy Laboratory, Golden, Colorado 80401, USA

14 <sup>2</sup>Department of Physics and Astronomy, Bowling Green State University, Bowling Green, Ohio  
15 43403, USA

16 <sup>3</sup>Colorado State University, Fort Collins, Colorado, 80523, USA

17  
18 \*Present affiliation: 1. Ningbo Institute of Materials Technology and Engineering, Chinese  
19 Academy of Sciences, Ningbo City, Zhejiang Province, 315201, China

20 2. Ningbo New Materials Testing and Evaluation Center CO., Ltd, Ningbo City, Zhejiang Province,  
21 315201, China

22 Corresponding author: [nick.cxiao@gmail.com](mailto:nick.cxiao@gmail.com).

44 Table S1. Cell performance of unstressed and stressed devices.

| Cell | Unstressed           |                                       |        |          | Stressed             |                                       |        |          |
|------|----------------------|---------------------------------------|--------|----------|----------------------|---------------------------------------|--------|----------|
|      | V <sub>oc</sub> (mV) | J <sub>sc</sub> (mA/cm <sup>2</sup> ) | FF (%) | Eff. (%) | V <sub>oc</sub> (mV) | J <sub>sc</sub> (mA/cm <sup>2</sup> ) | FF (%) | Eff. (%) |
| 1    | 829.2                | 27.6                                  | 72.6   | 16.6     | 787.5                | 28.5                                  | 45.9   | 10.3     |
| 2    | 828.6                | 27.2                                  | 74.4   | 16.8     | 786.6                | 28.3                                  | 47.9   | 10.7     |
| 3    | 829.2                | 27.8                                  | 75.0   | 17.3     | 784.5                | 27.7                                  | 56.8   | 12.4     |
| 4    | 829.9                | 27.7                                  | 72.4   | 16.6     | 789.9                | 28.8                                  | 43.1   | 9.8      |
| 5    | 829.3                | 27.4                                  | 74.8   | 17.0     | 790.3                | 27.6                                  | 46.9   | 10.2     |
| 6    | 828.4                | 27.2                                  | 75.4   | 17.0     | 790.7                | 26.9                                  | 51.8   | 11.0     |
| 7    | 829.5                | 28.4                                  | 70.3   | 16.5     | 792.0                | 28.6                                  | 35.2   | 8.0      |
| 8    | 829.4                | 28                                    | 73.9   | 17.1     | 792.6                | 29.4                                  | 42.4   | 9.9      |
| 9    | 827.9                | 27.2                                  | 75.2   | 16.9     | 792.9                | 28.5                                  | 50.2   | 11.3     |
| 10   | 829.2                | 28.4                                  | 72.8   | 17.1     | 795.9                | 28.8                                  | 45.3   | 10.4     |
| 11   | 830.4                | 28.2                                  | 74.3   | 17.4     | 794.8                | 29.7                                  | 47.4   | 11.2     |
| 12   | 829.1                | 27.9                                  | 75.7   | 17.5     | 792.6                | 29.1                                  | 51.5   | 11.9     |
| 13   | 750.4                | 29.1                                  | 66.4   | 14.5     | 717.9                | 29.0                                  | 51.0   | 10.6     |
| 14   | 752.1                | 29.9                                  | 64.1   | 14.4     | 723.9                | 29.4                                  | 46.3   | 9.9      |
| 15   | 763.4                | 32.0                                  | 66.9   | 16.4     | 728.4                | 29.8                                  | 38.1   | 8.3      |
| 16   | 756.2                | 30.3                                  | 67.6   | 15.5     | 719.0                | 30.7                                  | 41.9   | 9.2      |

45

46

47

Table S2. Cell performance change and statistical results of unstressed and stressed devices.

| Cell        | Absolute change in performance |                                       |                 |                   | Change in performance relative to t=0 h |                     |                 |                   |
|-------------|--------------------------------|---------------------------------------|-----------------|-------------------|-----------------------------------------|---------------------|-----------------|-------------------|
|             | $\Delta V_{oc}$ (mV)           | $\Delta J_{sc}$ (mA/cm <sup>2</sup> ) | $\Delta FF$ (%) | $\Delta Eff.$ (%) | $\Delta V_{oc}$ (%)                     | $\Delta J_{sc}$ (%) | $\Delta FF$ (%) | $\Delta Eff.$ (%) |
| 1           | -41.7                          | 0.9                                   | -26.7           | -6.3              | -5.0                                    | 3.3                 | -36.8           | -38.0             |
| 2           | -42.0                          | 1.1                                   | -26.5           | -6.1              | -5.1                                    | 4.0                 | -35.6           | -36.3             |
| 3           | -44.7                          | -0.1                                  | -18.2           | -4.9              | -5.4                                    | -0.4                | -24.3           | -28.3             |
| 4           | -40.0                          | 1.1                                   | -29.3           | -6.8              | -4.8                                    | 4.0                 | -40.5           | -41.0             |
| 5           | -39.0                          | 0.2                                   | -27.9           | -6.8              | -4.7                                    | 0.7                 | -37.3           | -40.0             |
| 6           | -37.7                          | -0.3                                  | -23.6           | -6.0              | -4.6                                    | -1.1                | -31.3           | -35.3             |
| 7           | -37.5                          | 0.2                                   | -35.1           | -8.5              | -4.5                                    | 0.7                 | -49.9           | -51.5             |
| 8           | -36.8                          | 1.4                                   | -31.5           | -7.2              | -4.4                                    | 5.0                 | -42.6           | -42.1             |
| 9           | -35.0                          | 1.3                                   | -25.0           | -5.6              | -4.2                                    | 4.8                 | -33.2           | -33.1             |
| 10          | -33.3                          | 0.4                                   | -27.5           | -6.7              | -4.0                                    | 1.4                 | -37.8           | -39.2             |
| 11          | -35.6                          | 1.5                                   | -26.9           | -6.2              | -4.3                                    | 5.3                 | -36.2           | -35.6             |
| 12          | -36.5                          | 1.2                                   | -24.2           | -5.6              | -4.4                                    | 4.3                 | -32.0           | -32.0             |
| 13          | -32.5                          | -0.1                                  | -15.4           | -3.9              | -4.3                                    | -0.3                | -23.2           | -26.9             |
| 14          | -28.2                          | -0.5                                  | -17.8           | -4.5              | -3.7                                    | -1.7                | -27.8           | -31.3             |
| 15          | -35.0                          | -2.2                                  | -28.8           | -8.1              | -4.6                                    | -6.9                | -43.0           | -49.4             |
| 16          | -37.2                          | 0.4                                   | -25.7           | -6.3              | -4.9                                    | 1.3                 | -38.0           | -40.6             |
| <b>Avg.</b> | <b>-37.0</b>                   | <b>0.4</b>                            | <b>-25.6</b>    | <b>-6.2</b>       | <b>-4.6</b>                             | <b>1.5</b>          | <b>-35.6</b>    | <b>-37.5</b>      |
| <b>Std.</b> | <b>4.0</b>                     | <b>0.9</b>                            | <b>5.1</b>      | <b>1.2</b>        | <b>0.4</b>                              | <b>3.2</b>          | <b>7.0</b>      | <b>6.8</b>        |

48

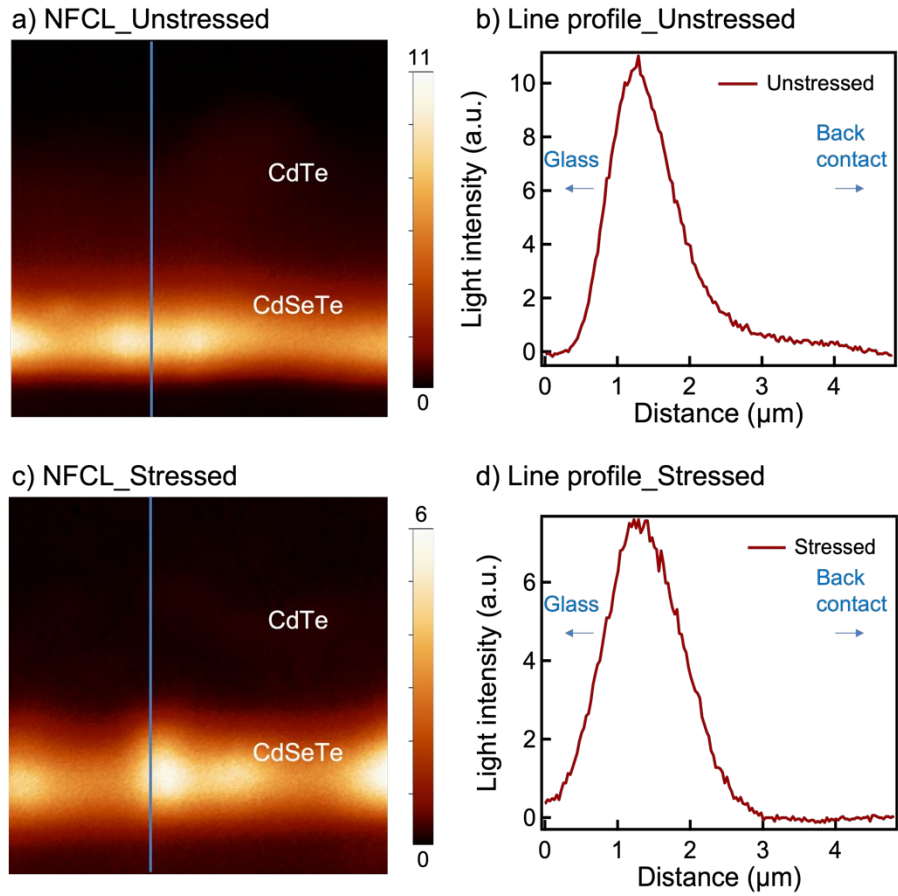

49 Figure S1. Near-field cathodoluminescence results. a) unstressed CdSeTe/CdTe device; b) light intensity  
 50 profile of NF-CL marked in a); c) stressed CdSeTe/CdTe device; d) light intensity profile of NF-CL  
 51 marked in c).  
 52  
 53  
 54

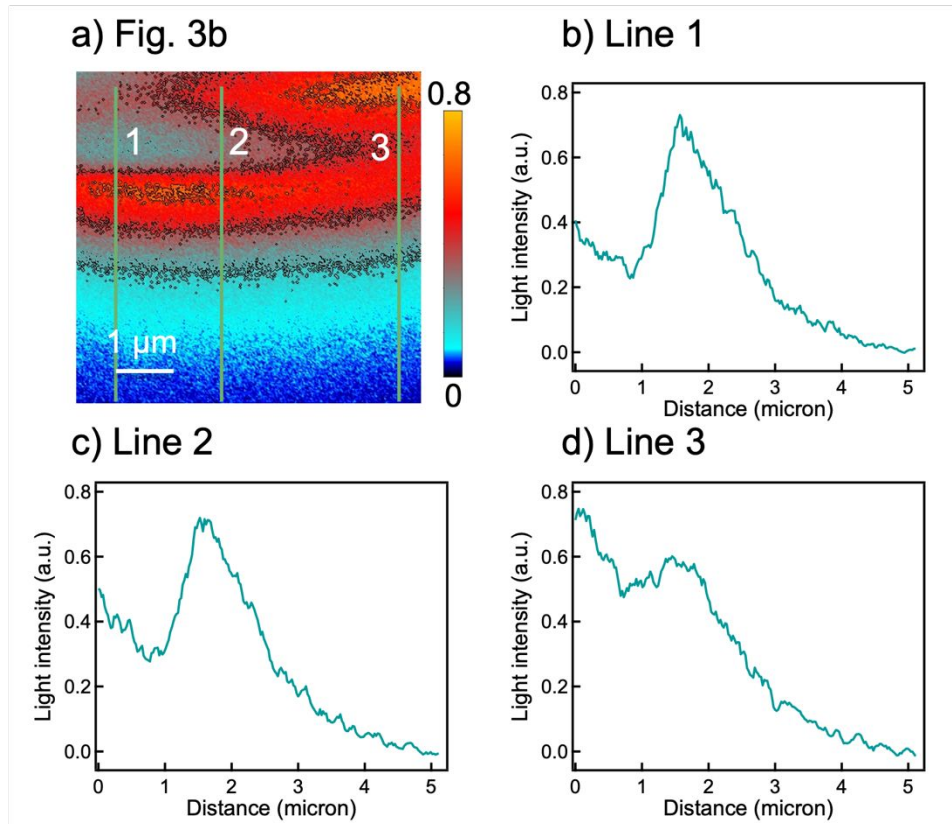

55  
 56 Figure S2. More decay line profiles in Figure 3b, showing the carrier transport decay profiles are not a  
 57 single decay.  
 58

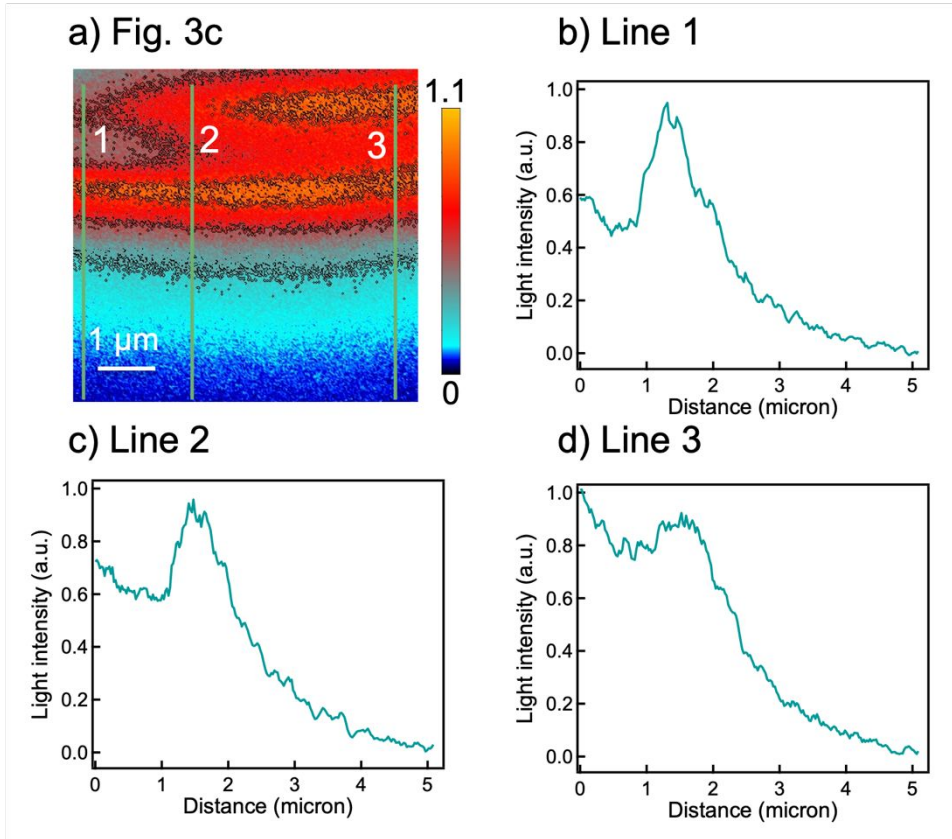

59  
60  
61  
62  
63  
64  
65  
66  
67  
68  
69  
70  
71  
72  
73  
74  
75  
76  
77  
78  
79  
80  
81

Figure S3. More decay line profiles in Figure 3c, showing the carrier transport decay profiles are not a single decay.

82 On another unstressed device, we show the dual peak feature is reproducible:  
83

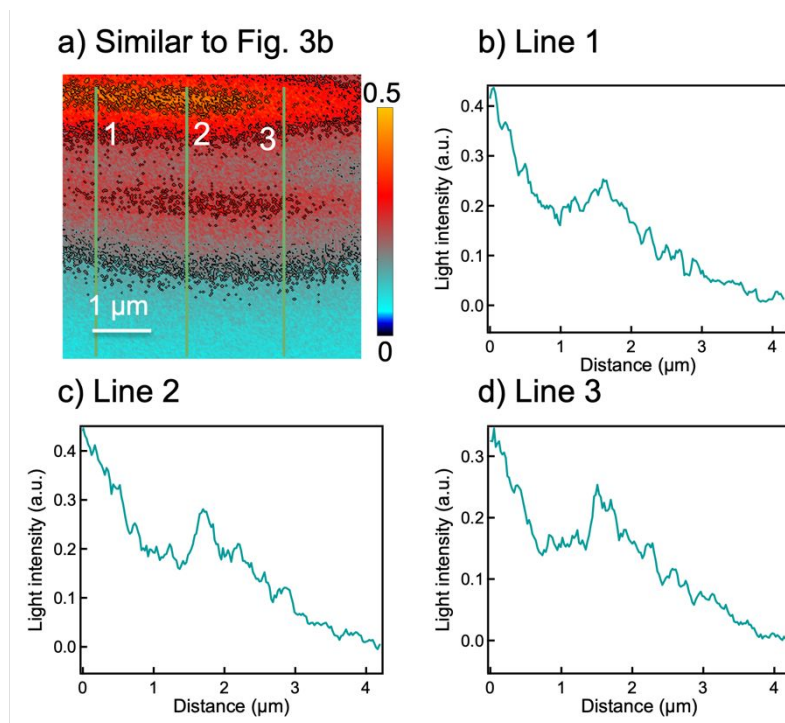

84  
85 Figure S4. Transport Imaging results on another unstressed device, experimental set up similar to Figure  
86 3b. a) TI mapping; b-d) light intensity profiles of TI marked in a), showing the carrier transport decay  
87 profiles are not a single decay.  
88  
89  
90  
91  
92  
93  
94  
95  
96  
97

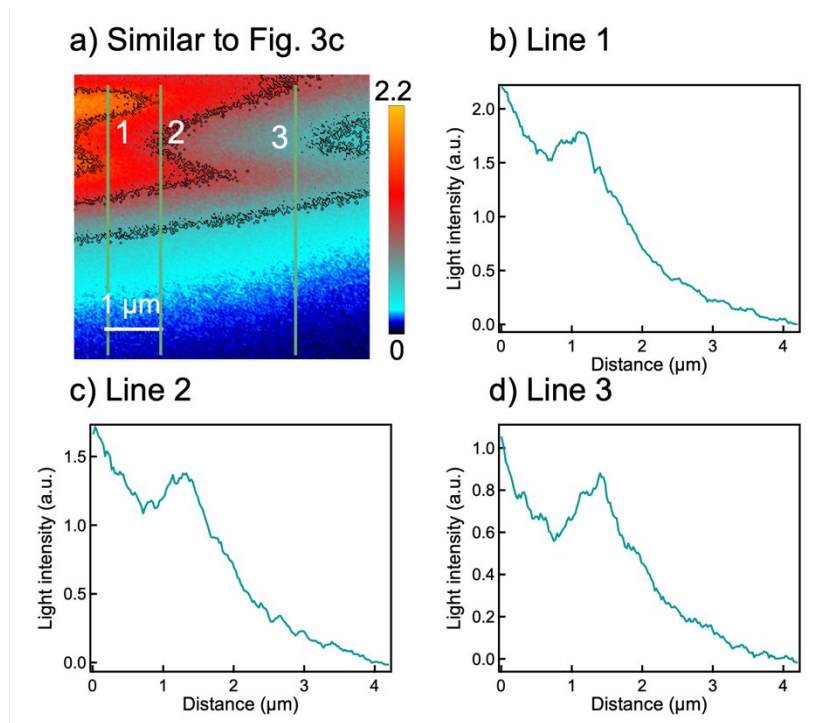

98  
 99  
 100  
 101  
 102  
 103  
 104  
 105  
 106  
 107  
 108  
 109

Figure S5. Transport Imaging results on another unstressed device, experimental set up similar to Figure 3c. a) TI mapping; b-d) light intensity profiles of TI marked in a), showing the carrier transport decay profiles are not a single decay.

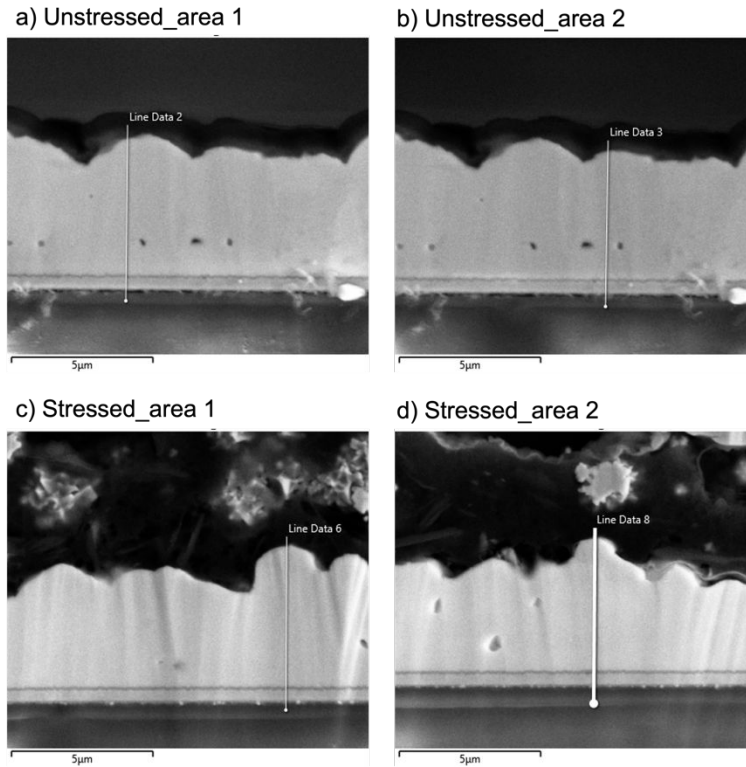

110  
 111  
 112  
 113  
 114  
 115  
 116  
 117  
 118  
 119  
 120  
 121  
 122  
 123  
 124  
 125  
 126  
 127  
 128  
 129  
 130  
 131  
 132  
 133  
 134

Figure S6. SEM EDS on multiple locations of unstressed and stressed cells, line profiles shown in Figure 5. Note that we chose areas with similar thickness for better comparison. In Figure 5, the shoulder at 3 µm may be due to rough topography, because EDS has a large signal generation volume, the signal at ~3 µm may involve signal from different amounts of underneath materials.



135 Figure S7 (a) shows the band edges for the two smoothing parameters  $s = 0.8$  and  $s = 2.4$ . The  
 136 e-beam is located at  $d = 1.4 \mu\text{m}$  with a generation rate that is sufficient to screen the built-in field  
 137 near the junction and cause slight fluctuations in the band edges. A zoomed in region of the band  
 138 edges near the observed TI peaks is shown to illustrate the subtle changes in the energetic  
 139 differences between the quasi-Fermi levels and their respective bands for the two smoothing  
 140 parameters. The fluctuations are less pronounced for the  $s = 2.4$  case. Electron density profiles  
 141 corresponding to the band edges are shown in Figure S7(b), exhibiting the two peaks for the  $s =$   
 142  $0.8$  case that correspond to the peaks in radiative recombination and the observed TI profiles. There  
 143 is only a single electron density peak for the  $s = 2.4$  case. The hole density profiles follow the  
 144 same pattern in this region (not shown).

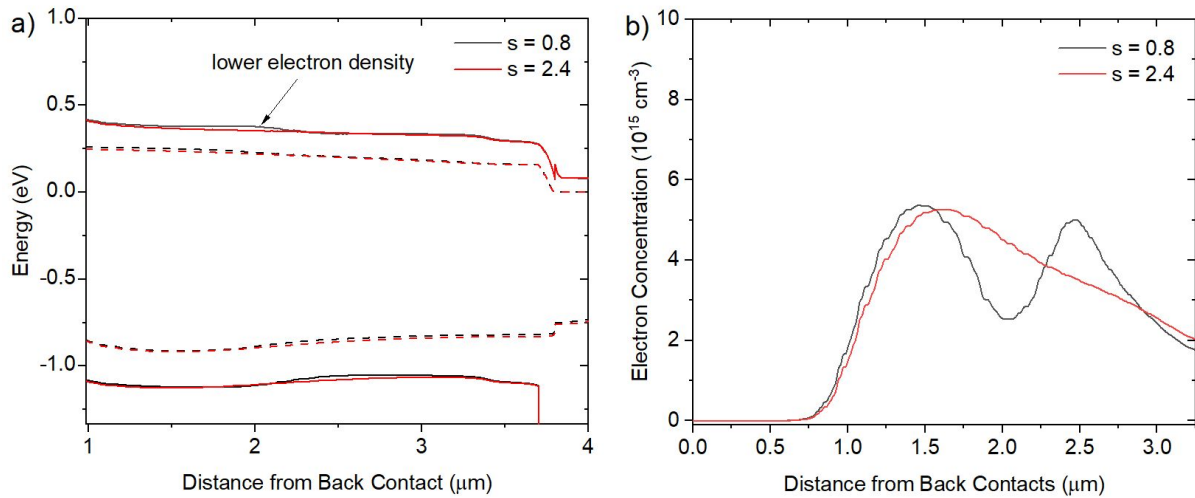

145  
 146  
 147 Figure S7. (a) band edges and (b) electron density profiles for e-beam excitation at  $d = 1.4 \mu\text{m}$  with band  
 148 gap smoothing parameters of  $s = 0.8$  and  $s = 2.4$ . A close-up of the excitation region shows that at  $s =$   
 149  $0.8$ , slight fluctuations in the band edges (a) can cause double or single peaks in the electron density (b). A  
 150 similar result holds for hole density, resulting in the observed peaks in radiative recombination and,  
 151 therefore, TI measurements.

152  
 153  
 154

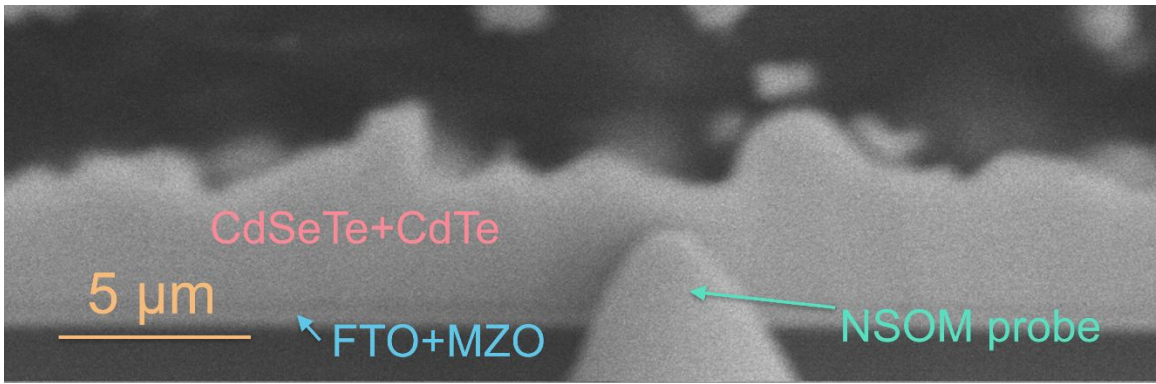

Figure S8. NSOM probe landing on the cross-sectional surface of a CdSeTe/CdTe cell.

155  
156  
157  
158  
159  
160  
161  
162  
163  
164  
165  
166  
167  
168  
169  
170  
171  
172  
173  
174  
175

Scan 1:

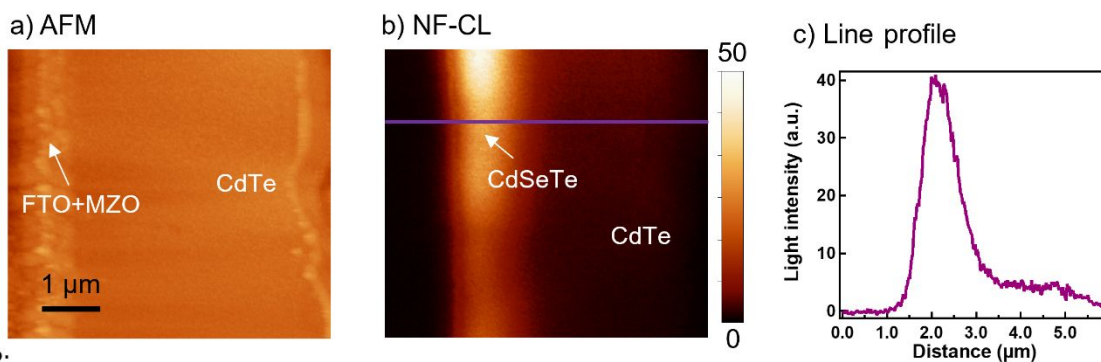

Scan 2:

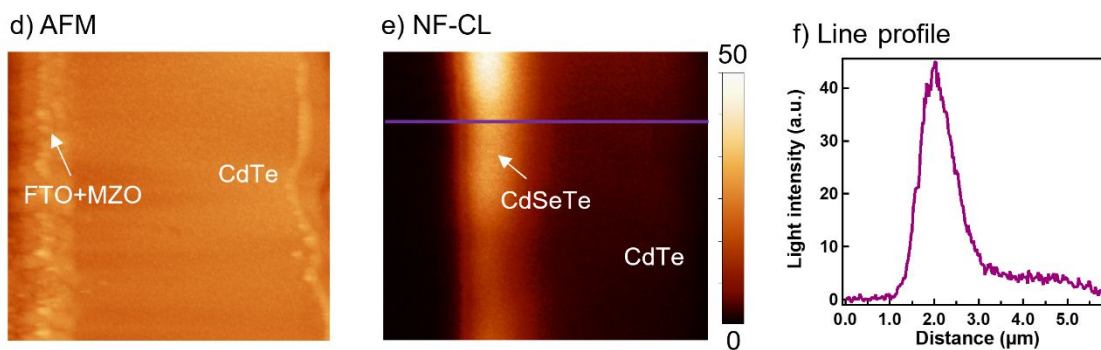

176  
177 Figure S9. Two consecutive scans of NF-CL on the same location of unstressed CdSeTe/CdTe devices.  
178 The electron beam condition is 20 kV, 0.38 nA, which led to a different light intensity than Figure 2. The  
179 results demonstrate reliable measurements with no carbon deposition contamination affects the NF-CL  
180 and further TI analysis. The AFM data is shown to help visualize where the NF-CL data is coming from.

181  
182  
183  
184  
185  
186  
187  
188  
189  
190  
191  
192  
193  
194

195 Table S3. Baseline device model parameters<sup>1-4</sup>.

| Parameter         | Symbol           | Unit                | SnO <sub>2</sub> :F | Mg(Zn,O)            | p-Cd(Se,Te)             | n-Cd(Se,Te)           |
|-------------------|------------------|---------------------|---------------------|---------------------|-------------------------|-----------------------|
| Thickness         | $h$              | nm                  | 400                 | 100                 | 3,400                   | 300                   |
| Band Gap          | $E_g$            | eV                  | 3.6                 | 3.75                | 1.5–1.39 <sup>(a)</sup> | 1.39                  |
| Rel. Permittivity | $\epsilon$       |                     | 9.0                 | 9.0                 | 9.4                     | 9.4                   |
| Electron Affinity | $\chi$           | eV                  | 4.4                 | 4.49 <sup>(b)</sup> | graded <sup>(a)</sup>   | 4.49                  |
| Mobility          | $\mu_n, \mu_p$   | cm <sup>2</sup> /Vs | 100, 25             | 1, 25               | 320, 40                 | 320, 40               |
| Lifetime          | $\tau_n, \tau_p$ | ns                  | 0.1, 0.1            | 0.1, 0.1            | 2, 2                    | 2, 2                  |
| Doping            | $N_A, N_D$       | cm <sup>-3</sup>    | n: 10 <sup>17</sup> | n: 10 <sup>14</sup> | p: 4x10 <sup>14</sup>   | n: 4x10 <sup>15</sup> |

196 Notes:

197 (a) Cd(Se,Te) bandgap was graded as described in main text. The affinity was graded such that  
198 the band gap changes were completely accommodated by changes in the conduction band.199 (b) MZO electron affinity was reduced to 4.22 eV in the stressed device to account in part for  
200 the observed FF loss.

- 201 • For the Schottky contacts, front and back metal work functions were set to 4.5 and 5.6 eV  
202 (pre-stress)/5.5 eV (post-stress), respectively.
- 203 • Surface recombination velocities at the front and back contacts were set to 10<sup>7</sup> cm/s.
- 204 • Cd(Se,Te)/MZO interface defect density was 10<sup>9</sup> cm<sup>-2</sup> acceptor type with capture cross-  
205 sections of 10<sup>-14</sup> cm<sup>2</sup> located at mid-gap.
- 206 • Fitting the JV data required adding a series resistance of  $R_s = 2 \Omega \text{ cm}^2$ .

207

208 **References**

- 209 (1) Munshi, A. H.; Kephart, J.; Abbas, A.; Raguse, J.; Beaudry, J.-N.; Barth, K.; Sites, J.; Walls,  
210 J.; Sampath, W. Polycrystalline CdSeTe/CdTe Absorber Cells With 28 mA/cm<sup>2</sup> Short-  
211 Circuit Current. *IEEE Journal of Photovoltaics* **2018**, *8* (1), 310–314.  
212 <https://doi.org/10.1109/JPHOTOV.2017.2775139>.
- 213 (2) Kephart, J. M.; McCamy, J. W.; Ma, Z.; Ganjoo, A.; Alamgir, F. M.; Sampath, W. S. Band  
214 Alignment of Front Contact Layers for High-Efficiency CdTe Solar Cells. *Solar Energy*  
215 *Materials and Solar Cells* **2016**, *157*, 266–275. <https://doi.org/10.1016/j.solmat.2016.05.050>.
- 216 (3) Gloeckler, M.; Fahrenbruch, A. L.; Sites, J. R. Numerical Modeling of CIGS and CdTe Solar  
217 Cells: Setting the Baseline. In *Proceedings of 3rd World Conference on Photovoltaic Energy*  
218 *Conversion, 2003*; 2003; Vol. 1, pp 491-494 Vol.1.
- 219 (4) Klein, A. Energy Band Alignment in Chalcogenide Thin Film Solar Cells from  
220 Photoelectron Spectroscopy. *J. Phys.: Condens. Matter* **2015**, *27* (13), 134201.  
221 <https://doi.org/10.1088/0953-8984/27/13/134201>.

222

223

224
